# Supplementary material
Source: Elsevier journal article supplement (https://www.sciencedirect.com/science/article/pii/S2173505021000273)
Supplement: mmc1 [file S2173505021000273:mmc1.doc]

**APPENDIX A. Study survey.**

- Hospital name
  - Brief answer
- Province
  - Brief answer
- Does your hospital offer any psychological care program for health care professionals related to the current pandemic?
  - Yes / No
- Has the program / team been set up specifically to deal with the COVID-19 crisis or was a program already in place for emergencies and crises?
  - It was created specifically to address the COVID-19 crisis
  - There was already an intervention program for emergencies and crises.
- What is your role within the program?
  - Coordinator
  - Collaborator with healthcare activity
  - Collaborator without healthcare activity
  - Other (specify)
- Which is your professional profile?
  - Clinical psychologist
  - Non-clinical psychologist
  - Psychiatrist
  - Nurse
  - Clinical psychology intern
  - Psychiatry intern
  - Other
- What kind of professionals are involved in the program?
  - Clinical psychologists
  - Non-clinical psychologists
  - Psychiatrists
  - Nurses
  - Clinical psychology interns
  - Psychiatry interns
  - Others
- Number of professionals participating
  - Clinical psychologists (number)
  - Non-clinical psychologists (number)
  - Psychiatrists (number)
  - Nurses (number)
  - Clinical Psychology Interns (number)
  - Psychiatry Interns (number)
  - Mental Health Nurse Interns (number)
  - Others
- Have new staff been hired to reinforce the COVID-19 crisis response team?
  - Yes / No
- Have external volunteers been incorporated to reinforce the COVID-19 crisis response team?
  - Yes / No
- Has the team received training in this specific protocol?
  - - Yes/No
- Are there team members with previous training in psychological care for crises / catastrophes / emergencies?
  - - Yes/No
- What are the main goals of the program?
  - Decrease physiological activation / stress
  - Improve emotional regulation
  - Improve communication within healthcare teams
  - Improve professionals' communication skills with patients and families
  - Other (if possible, specify)
- Type of assistance included in the program
  - On-site intervention (emergencies, ICU, wards)
  - Group intervention in another hospital area
  - Online group intervention
  - Face-to-face individual attention
  - Online / telephone attendance
  - Liaison with other clinical services
  - Pharmacological treatment
- Is the performed intervention manualized?
  - Yes/No
- Is there a limitation in the number of sessions that can be offered? / Is there a limited number of sessions¿
  - Yes/No
- If the program had a limited number of sessions, indicate how many.
  - Number
- Main techniques used in group interventions
  - Psychoeducation
  - Mindfulness
  - Relaxation
  - Cognitive behavioral techniques
  - Others (specify)
- Main techniques used in individual interventions
  - Psychoeducation
  - Mindfulness
  - Relaxation
  - Cognitive behavioral techniques
  - Others (specify)
- Is there supervision / monitoring of the interventions?
  - Yes/No
- Is the program supplemented with any of the following resources? (only those that incorporate materials for the intervention, not those whose aim is specifically to advertise the program)
  - Posters in the hospital with recommendations or guidelines
  - Brochures with recommendations or guidelines
  - Books
  - Videos
  - Audio recordings
  - Apps
  - Other (specify)
- Has the team started to provide the interventions?
  - Yes/No
- On what date did the activity start?
  - Date
- How many days a week is the service provided?
  - Monday to Friday
  - Monday to Sunday
  - Other (specify)
- What time of the day does the program start? (Start of workday)
  - Time
- What time of day does the program end? (End of workday)
  - Time
- Indicate the professional categories to which the program applies
  - Physicians
  - Nurses
  - Nursing assistants
  - Other health care technicians
  - Orderlies
  - Cleaning staff
  - Other
- Who led the creation of the program?
  - Hospital director
  - Head of department
  - Mental health professionals
  - Emergency professionals
  - Other (specify)
- Date of the first meeting to create the COVID-19 service program
  - Date
- What is the professional profile of the program coordinator?
  - There is no specific coordinator
  - Clinical psychologist
  - Psychiatrist
  - Nurse
  - Other (specify)
- Indicate which of the following resources have been used to develop the intervention program
  - No resources were used
  - Manuals
  - Clinical protocols and guidelines
  - Scientific papers
  - Programs already developed by other hospitals
  - Other (specify)
- Which of the following protective tools does the team use?
  - None
  - Gown
  - Gloves
  - Mask
  - Other (specify)
- Have team members received training in the correct use of these or other protective tools?
  - Yes/No
